# Supplementary material for: Genetic Alterations and Resectability Predict Outcome in Patients with Neuroblastoma Assigned to High-Risk Solely by MYCN Amplification
Source: MDPI journal article supplement (doi:10.3390/cancers13174360), 2021-08-28
Supplement: s1 [file s1]

## Supplementary Material

### Supplementary Figure S1

EFS and OS of 190 study group patients with *MYCN* amplification by stage (1, 2, 3, 4S vs. stage 4 aged <18 months)

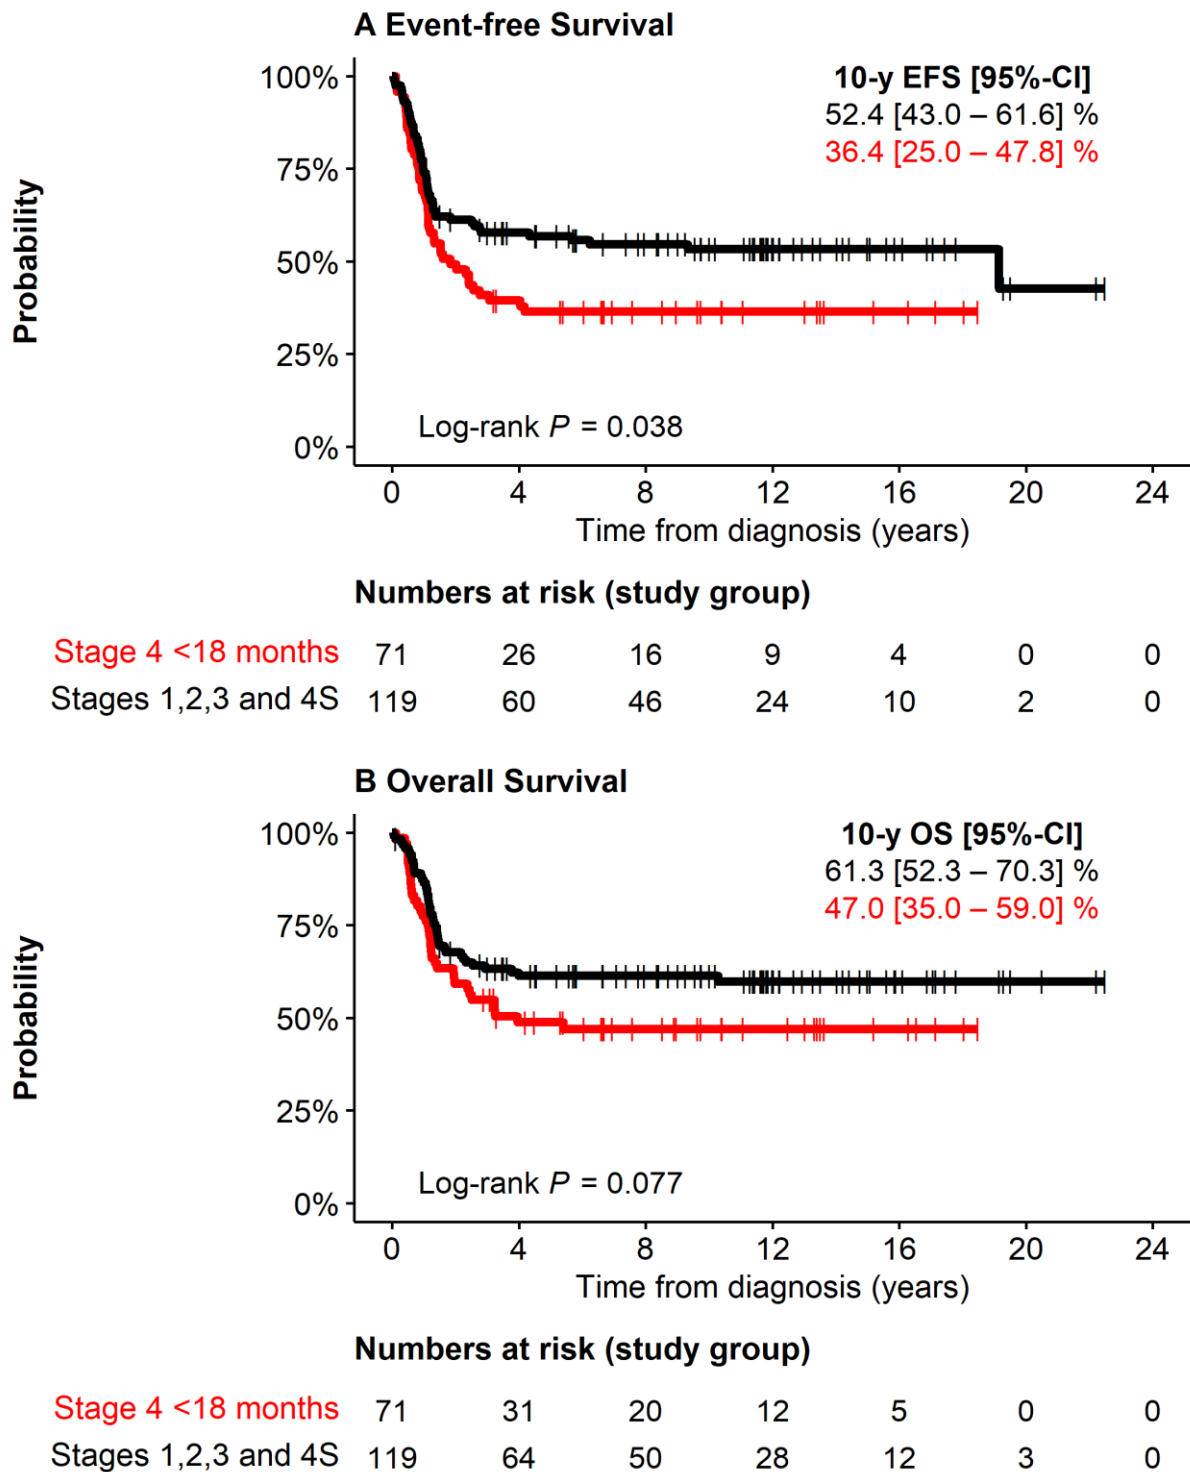

## Supplementary Figure S2

EFS and OS of 185 study group patients by stage and best result of surgical resection

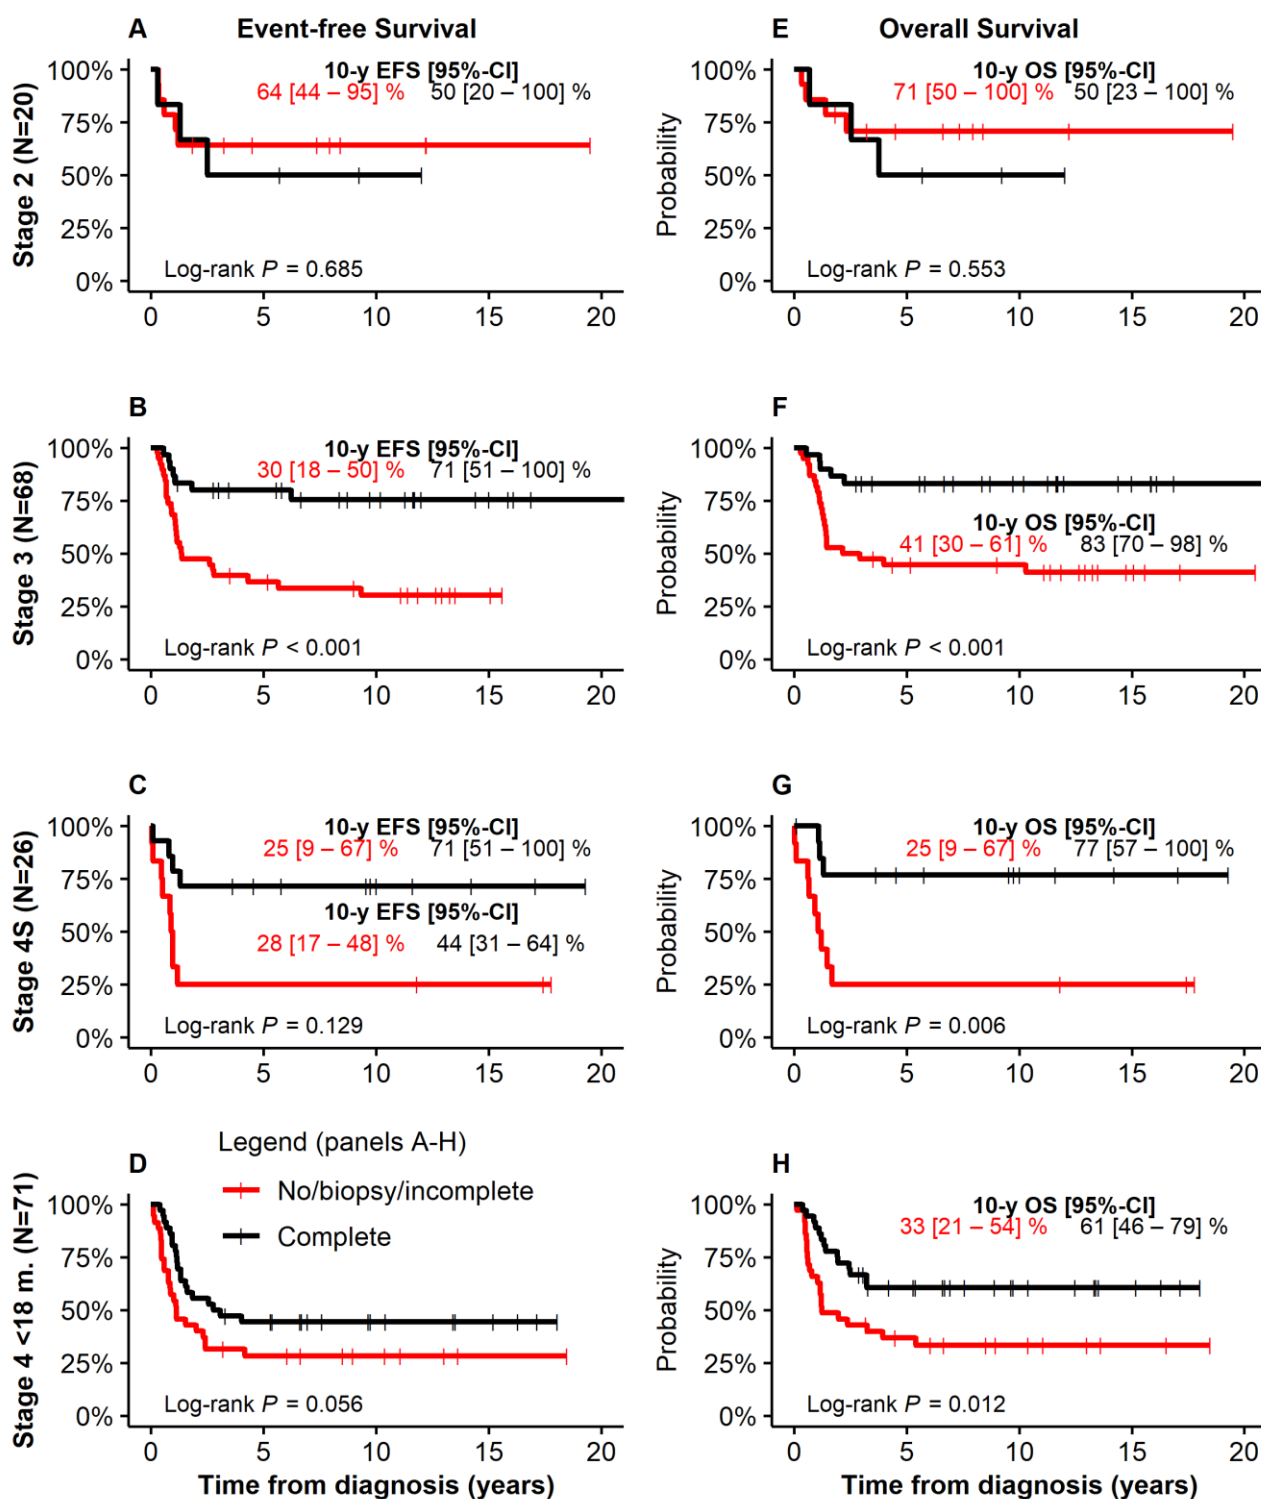

### Supplementary Figure S3

EFS and OS of 87 study group patients by independent risk factors 'presence of mutation' (mutation vs. no mutation) and 'best result of surgical resection'\* (no/incomplete/biopsy vs. complete)

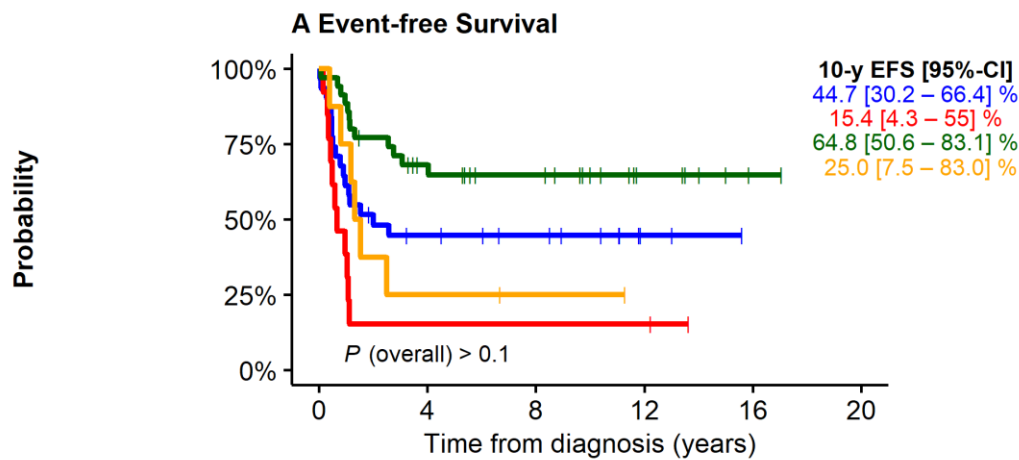

**Numbers at risk (study group)**

|                                   |    |    |    |   |   |   |
|-----------------------------------|----|----|----|---|---|---|
| No/incomplete/<br>biopsy, no mut. | 31 | 12 | 9  | 2 | 0 | 0 |
| No/incomplete/<br>biopsy, mut.    | 13 | 2  | 2  | 2 | 0 | 0 |
| Complete, no mut.                 | 35 | 20 | 15 | 6 | 1 | 0 |
| Complete, mutation                | 8  | 2  | 1  | 0 | 0 | 0 |

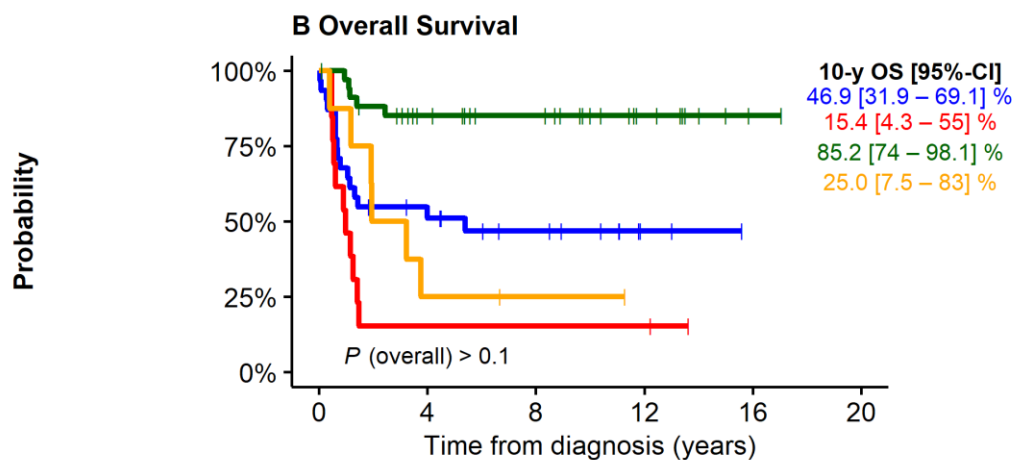

**Numbers at risk (study group)**

|                                   |    |    |    |   |   |   |
|-----------------------------------|----|----|----|---|---|---|
| No/incomplete/<br>biopsy, no mut. | 31 | 14 | 9  | 2 | 0 | 0 |
| No/incomplete/<br>biopsy, mut.    | 13 | 2  | 2  | 2 | 0 | 0 |
| Complete, no mut.                 | 35 | 23 | 18 | 8 | 1 | 0 |
| Complete, mutation                | 8  | 2  | 1  | 0 | 0 | 0 |

\*If more than one surgical intervention, the best result was counted.

**Pairwise comparisons (Log-rank p-values, Bonferroni-Holm adjusted)**

**EFS:**

No/incomplete/biopsy, no mutation vs. Complete, no mutation: 0.059

No/incomplete/biopsy, no mutation vs. No/incomplete/biopsy, mutation: 0.059

No/incomplete/biopsy, no mutation vs. Complete, mutation: N.A. (curves cross)  
Complete, no mutation vs. No/incomplete/biopsy, mutation: < 0.001  
Complete, no mutation vs. Complete, mutation: 0.057  
No/incomplete/biopsy, mutation vs. Complete, mutation: 0.155

**OS:**

No/incomplete/biopsy, no mutation vs. Complete, no mutation: 0.002  
No/incomplete/biopsy, no mutation vs. No/incomplete/biopsy, mutation: 0.065  
No/incomplete/biopsy, no mutation vs. Complete, mutation: N.A. (curves cross)  
Complete, no mutation vs. No/incomplete/biopsy, mutation: < 0.001  
Complete, no mutation vs. Complete, mutation: 0.001  
No/incomplete/biopsy, mutation vs. Complete, mutation: 0.164
